# Supplementary material for: Encapsulating silicon nanoparticles into mesoporous carbon forming pomegranate-structured microspheres as a high-performance anode for lithium ion batteries
Source: Royal Society of Chemistry journal article supplement (doi:10.1039/c7ta03294c), 2017-01-01
Supplement: c7ta03294c1.pdf [file c7ta03294c1.pdf]

## Supporting Information

### Encapsulating silicon nanoparticles into mesoporous carbon forming pomegranate-structure microspheres as high-performance anode for lithium ion batteries

Tong Shen,<sup>a</sup> Xin-hui Xia,<sup>\*a</sup> Dong Xie,<sup>a</sup> Zhu-jun Yao,<sup>a</sup> Yu Zhong,<sup>a</sup> Ji-ye Zhan,<sup>a</sup> Dong-huang Wang,<sup>a</sup> Jian-bo Wu,<sup>b</sup> Xiu-li Wang,<sup>\*a</sup> and Jiang-ping Tu<sup>\*a</sup>

<sup>a</sup>. State Key Laboratory of Silicon Materials, Key Laboratory of Advanced Materials and Applications for Batteries of Zhejiang Province, and School of Materials Science and Engineering, Zhejiang University, Hangzhou 310027, China

<sup>b</sup>. School of Physics & Electronic Engineering, Taizhou University, Taizhou 318000, China

\*Email: helloxxh@zju.edu.cn; wangxl@zju.edu.cn; tujp@zju.edu.cn

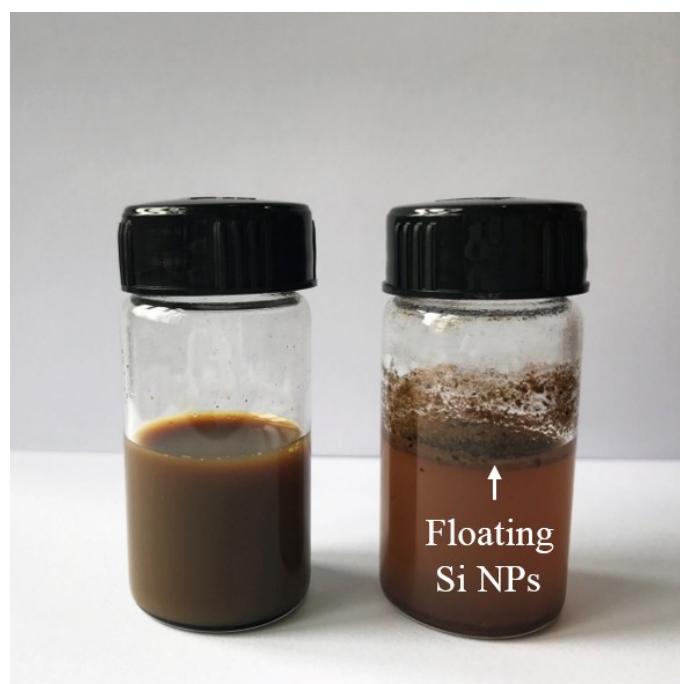

**Figure S1.** Dispensability of Si NPs in water with and without adding F-127. The Si NPs are totally separated in the water and form a homogeneous suspension (a), while there are a large amount of Si NPs still floating over the water after sonicate (b).

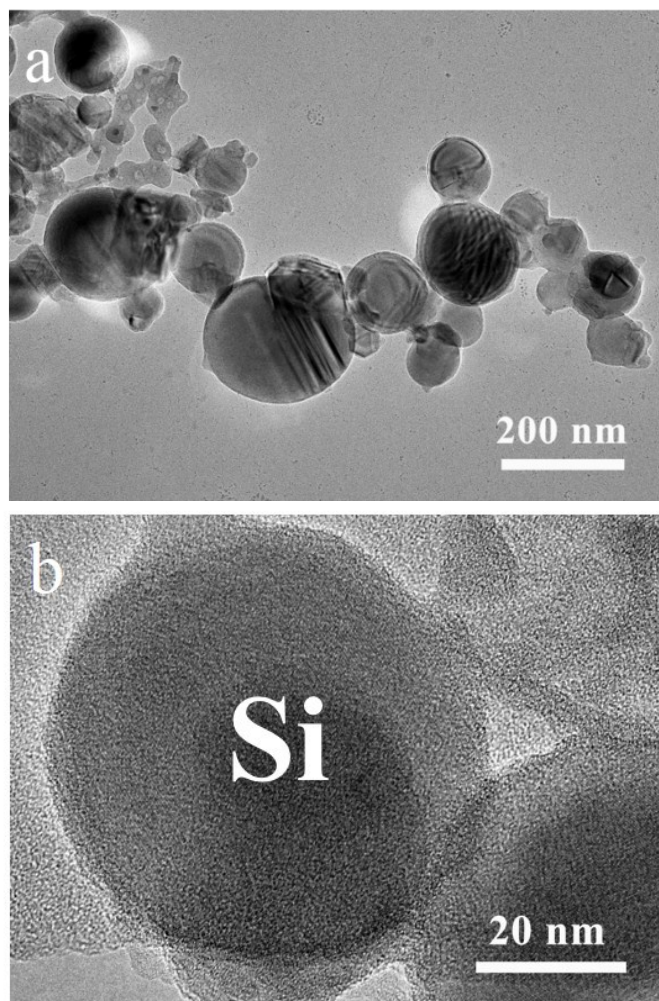

**Figure S2.** TEM images of Si NPs (a) and single Si nanoparticle.

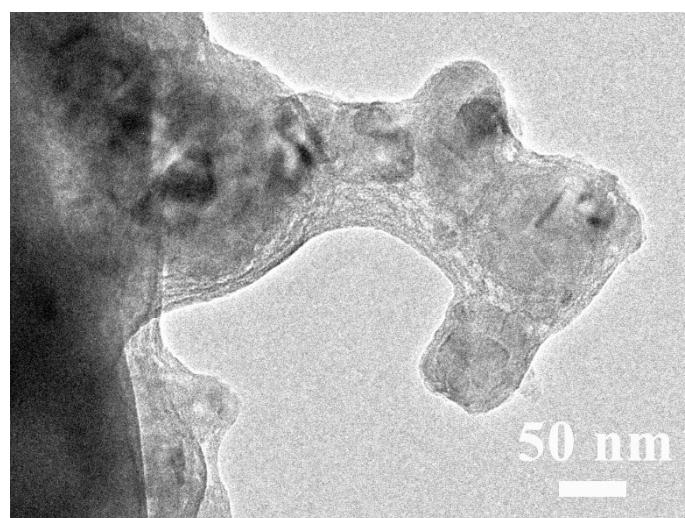

**Figure S3.** Magnified TEM image of MP-Si/C.

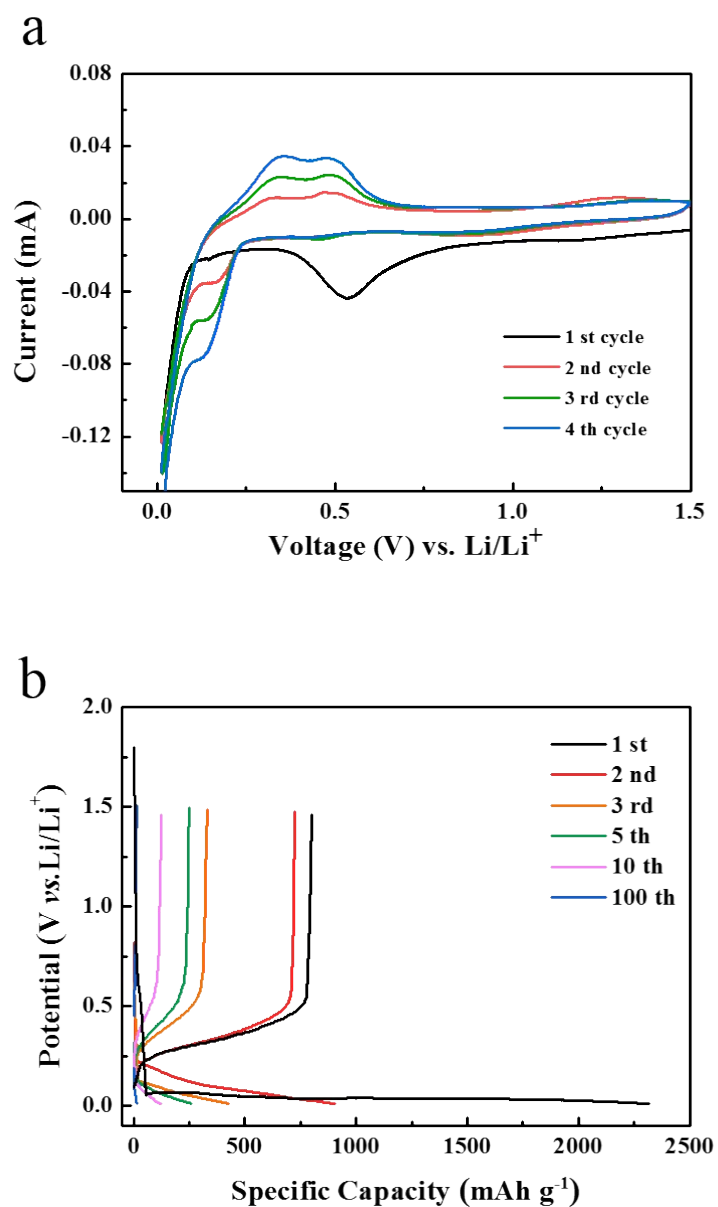

**Figure S4.** Electrochemical characterizations of Si NPs: (a) CV curves at a scan rate of  $0.1 \text{ mV s}^{-1}$  between 0.01 and 1.5 V versus  $\text{Li/Li}^+$ . (b) Charge/discharge voltage profiles of 1st, 2nd, 3rd, 5th, 10th and 100th cycle at  $0.2 \text{ A g}^{-1}$ .

**Table S1.** Comparison of the electrochemical performance of silicon/carbon composite anodes.

| Sample                   | Initial coulombic efficiency (%) | Current density (A g <sup>-1</sup> ) | Cycle number | Stable capacity after n-cycles (mAh g <sup>-1</sup> ) | Capacity retention | Ref.            |
|--------------------------|----------------------------------|--------------------------------------|--------------|-------------------------------------------------------|--------------------|-----------------|
| Porous Si/rGO            | 48.5%                            | 0.05                                 | 100          | 1004                                                  | 65.3%              | 1               |
| Si/C NBs                 | 80%                              | 0.05                                 | 50           | 1020                                                  | 84.3%              | 2               |
| Si NPs/IOC (40%)         | 79%                              | 0.1                                  | 50           | 1233                                                  | 81%                | 3               |
| C-PDA-Si NFs             | 80% (0.05 A g <sup>-1</sup> )    | 0.1                                  | 50           | 1601                                                  | 65.3%              | 4               |
| Si/rGO films             | 53%                              | 0.2                                  | 150          | 660                                                   | 62.7%              | 5               |
| Watermelon-inspired Si/C | 89.2% (0.06 A g <sup>-1</sup> )  | 0.3                                  | 500          | 465.8                                                 | 75.2%              | 6               |
| Si@PCM                   | 65.55%                           | 0.5                                  | 100          | 1249                                                  | 64.8%              | 7               |
| CuO@Si NWAs              | 36%                              | 0.84                                 | 50           | 1381                                                  | 57%                | 8               |
| rGO-porous Si            | 68.8% (0.05 A g <sup>-1</sup> )  | 1                                    | 200          | 830                                                   | 49%                | 9               |
| Si@C/GF                  | 61.5% (0.1 A g <sup>-1</sup> )   | 1                                    | 200          | ~650                                                  | 85.1%              | 10              |
| <b>MP-Si/C</b>           | <b>51.8%</b>                     | <b>0.2</b>                           | <b>100</b>   | <b>581</b>                                            | <b>77.4%</b>       | <b>Our work</b> |

#### References

1. H. Tang, J. Zhang, Y. J. Zhang, Q. Q. Xiong, Y. Y. Tong, Y. Li, X. L. Wang, C. D. Gu and J. P. Tu, *J. Power Sources*, 2015, **286**, 431-437.
2. W. Ren, Y. Wang, Q. Tan, Z. Zhong and F. Su, *J. Power Sources*, 2016, **332**, 88-95.
3. D. Gueon, D.-Y. Kang, J. S. Kim, T. Y. Kim, J. K. Lee and J. H. Moon, *J. Mater. Chem. A*, 2015, **3**, 23684-23689.
4. J. Kong, W. A. Yee, Y. Wei, L. Yang, J. M. Ang, S. L. Phua, S. Y. Wong, R. Zhou, Y. Dong, X. Li and X. Lu, *Nanoscale*, 2013, **5**, 2967-2973.
5. H. X. Zhang, S. L. Jing, Y. J. Hu, H. Jiang and C. Z. Li, *J. Power Sources*, 2016, **307**, 214-219.
6. Q. Xu, J. Y. Li, J. K. Sun, Y. X. Yin, L. J. Wan and Y. G. Guo, *Adv. Energy Mater.*, 2016, DOI: 10.1002/aenm.201601481, 1601481.
7. L. Wu, J. Yang, X. Zhou, M. Zhang, Y. Ren and Y. Nie, *J. Mater. Chem. A*, 2016, **4**, 11381-11387.
8. H. Wu, X. Xia, N. Du, Z. Li, B. Sun, Y. Chen and D. Yang, *J. Alloys Compd.*, 2016, **689**, 56-62.
9. L. S. Jiao, J. Y. Liu, H. Y. Li, T. S. Wu, F. Li, H. Y. Wang and L. Niu, *J. Power Sources*, 2016, **315**, 9-15.
10. F. Zhang, X. Yang, Y. Xie, N. Yi, Y. Huang and Y. Chen, *Carbon*, 2015, **82**, 161-167.
